# Supplementary material for: Ni(ii)-polypyridyl complexes as potential DNA binders
Source: Royal Society of Chemistry journal article supplement (doi:10.1039/d3nj00961k), 2023-01-01
Supplement: d3nj00961k1.pdf [file d3nj00961k1.pdf]

# Ni(II)-polypyridyl complexes as potential DNA binders

Priya Sahni<sup>a‡</sup>, Rahat Gupta<sup>a‡</sup>, Debakanta Tripathy<sup>b</sup>, Soumya Lipsa Rath<sup>\*c</sup> and Amlan K. Pal<sup>\*a</sup>

<sup>a</sup>Department of Chemistry, Indian Institute of Technology Jammu, Nagrota Bypass Road, Jammu and Kashmir – 181221, India

<sup>b</sup>Department of Chemistry, School of Advanced Sciences, VIT-AP University, Amaravati, Andhra Pradesh-522237, India

<sup>c</sup>Department of Biotechnology, National Institute of Technology, Warangal, Telengana-506004, India

‡Equal contribution

## Supporting Information

### Table of Content

|                                                               |         |
|---------------------------------------------------------------|---------|
| Materials, methods and instrumentation.....                   | 2 – 3   |
| Synthesis of complexes <b>1 – 3</b> .....                     | 3 – 5   |
| Characterization of complexes <b>1 – 3</b> (NMR Studies)..... | 6       |
| X-ray diffraction studies.....                                | 6 – 9   |
| Computational details.....                                    | 9 – 13  |
| Molecular docking and non-bonding interactions.....           | 13 – 15 |
| Optimized atomic coordinates.....                             | 16 – 22 |
| References.....                                               | 23      |

## Materials, methods and instrumentation

$^1\text{H}$ , and  $^{13}\text{C}$  NMR spectra were recorded with 500 MHz JEOL spectrometer (500 and 126 for  $^1\text{H}$ , and  $^{13}\text{C}$  respectively) in the deuterated solvents as mentioned in the experimental section. The following abbreviations have been used for multiplicity assignments: “s” for singlet, “d” for doublet, “t” for triplet, “m” for multiplet, and “br” for broad. Chemical shifts are reported in parts per million (ppm) relative to respective residual solvent protons and coupling constants (J) are reported in Hertz (Hz). Chromatography was performed on columns with an i.d. of 25-30 mm on silica gel (Silica gel, 100-200  $\mu\text{m}$ ). The progress of the reactions and the elution of the products were followed by TLC (silica gel on plastic sheets, 250  $\mu\text{m}$  with indicator F-254). Compounds were visualized under UV light.

High-resolution mass spectra were recorded by Xevo, G2-XS QT. Elemental analyses were recorded by UNICUBE®

**Photophysical measurements.** All photophysical measurements were carried out in deaerated acetonitrile at r.t. in septa-sealed quartz cells. UV-vis spectroscopy (UV) was completed at room temperature using a Cary 5000 UV-vis spectrophotometer. All samples were prepared in HPLC grade MeCN, with varying concentrations in the order of  $10^{-5}$  -  $10^{-6}$   $\mu\text{M}$ . Molar absorptivity determination was verified by linear least-squares fit of values obtained from at least four independent solutions at varying concentrations.

**Electrochemical measurements.** Cyclic voltammetry (CV) measurements were performed on an Electrochemical Analyzer potentiostat model 620E from CH Instruments at a sweep rate of 100 mV/s. Differential pulse voltammetry (DPV) was conducted with an increment potential of 0.004 V and a pulse amplitude, width and period of 50 mV, 0.05 s and 0.5 s, respectively. Solutions

for CV and DPV were prepared in *N,N'*-DMF and degassed by bubbling nitrogen through the solutions for about 6 min prior to scanning. Tetra(*n*-butyl)ammoniumhexafluorophosphate (TBAPF<sub>6</sub>; *ca.* 0.1 M in MeCN) was used as the supporting electrolyte. Glassy carbon, platinum and silver electrodes were used as the working, counter and reference electrodes, respectively. Ferrocene/ferrocenium (Fc/Fc<sup>+</sup>) redox couple was used as an internal reference with respect to a saturated calomel electrode (0.38 V vs SCE)<sup>1</sup> and the redox potentials were calibrated to this.

Experimental uncertainties are as follows: absorption maxima, ±2 nm; molar absorption coefficient, 10%; redox potentials, ± 10 mV.

Synthesis of bis[(2,6-bis(2,3,4,6,7,8-hexahydro-1*H*-pyrimido[1,2-*a*]pyrimidin-1-yl)pyridine)]Ni(II) hexafluorophosphate (**1**)

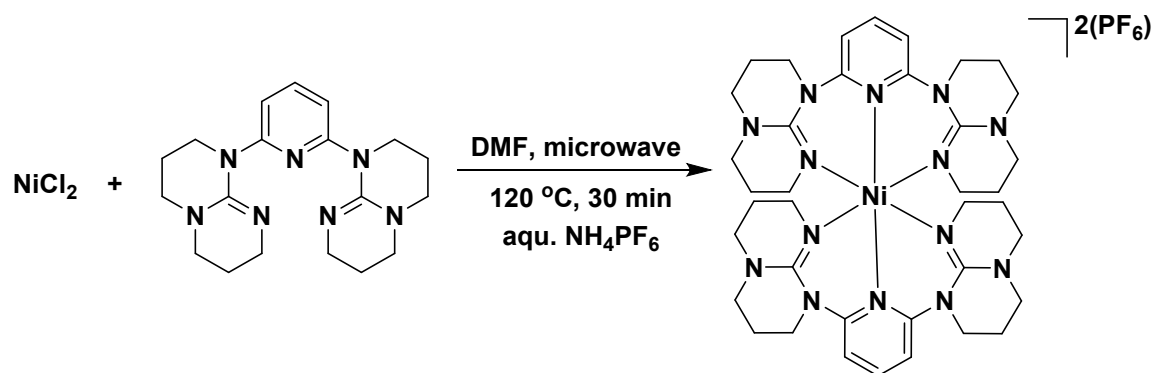

A microwave vial equipped with a magnetic stir bar was charged with NiCl<sub>2</sub> (50 mg, 0.38 mmol, 1 equiv.) in 12 mL DMF to get a green colour suspension. The resulting suspension was sonicated for 5 minutes to get a clear green-colour solution. To the solution **L1** (300 mg, 0.85 mmol, 2.2 equiv.) was added to get brown colour solution. The reaction mixture was left to stir at 180 °C for 30 minutes to obtain a clear light brown solution. The resulting reaction mixture was concentrated under reduced pressure to give a brown solid residue. The chloride salt was metathesized to the PF<sub>6</sub> salt by addition of an aliquot of saturated aqueous KPF<sub>6</sub> solution to the methanolic solution of the compound. The resulting beige solid was collected by filtration, washed with water (3 x 20 mL) and dried under vacuum. Crude yield: 317 mg. Crystals suitable for X-ray diffraction study were grown by vapour diffusion of diethylether into an acetonitrile solution of

the title compound. The magenta colour crystals were formed after 12 h (yield = 225 mg, 56.0%). M.P. – 254 °C (dec.). Rf: 0.25 (7:1, v/v acetonitrile/aliquot of KNO<sub>3</sub> saturated water on silica) <sup>1</sup>H NMR (500 MHz, DMSO-d<sub>6</sub>) δ (ppm): due to the paramagnetic nature of the product, only a few broad peaks at 52.92, 26.49, 15.70, 14.89, 8.71, 5.76, -1.34, -2.77, -6.40 ppm were observed. ESI+ MS: [M+2MeCN+Na]<sup>+</sup> Calculated: (C<sub>42</sub>H<sub>60</sub>N<sub>16</sub>NaNi) 869.44; Found: 869.15 (~ 6%). **Anal. Calcd** for C<sub>38</sub>H<sub>54</sub>N<sub>14</sub>NiP<sub>2</sub>F<sub>12</sub>·4H<sub>2</sub>O (MW 1127.612): C, 40.48; H, 5.54; N, 17.39, **Found:** C, 40.91; H, 4.91; N, 17.15.

Synthesis of bis[(2,6-bis(2,3,4,6,7,8-hexahydro-1*H*-pyrimido[1,2-*a*]pyrimidin-1-yl)pyrazine)Ni(II) hexafluorophosphate (**2**)

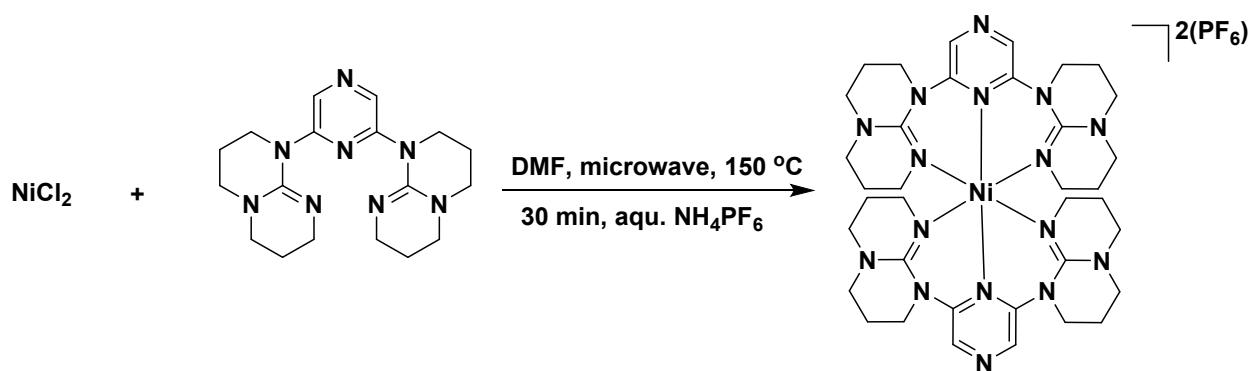

Complex **2** was synthesized following the similar procedure as that of complex **1**, however, ligand **L2** was used instead of ligand **L1**. Crude yield: 324 mg, Purified Yield = 274 mg, 68%. M.P. – 260 °C (dec.). Rf: 0.22 (7:1, v/v acetonitrile/aliquot of KNO<sub>3</sub> saturated water on silica). <sup>1</sup>H NMR (500 MHz, DMSO-d<sub>6</sub>) δ (ppm): due to the paramagnetic nature of the product, only a few broad peaks at 60.95, 25.33, 16.18, 8.54, 5.40, -1.42, -3.53 ppm were observed. ESI+ MS: [M-2PF<sub>6</sub>]<sup>2+</sup> Calculated: (C<sub>36</sub>H<sub>52</sub>N<sub>16</sub>Ni) 383.19; Found: 383.18 (~ 21%), [M-PF<sub>6</sub>]<sup>+</sup> Calculated: (C<sub>36</sub>H<sub>52</sub>N<sub>16</sub>F<sub>6</sub>PNi) 911.35; Found: 911.39 (< 1%). **Anal. Calcd** for C<sub>36</sub>H<sub>52</sub>N<sub>16</sub>NiP<sub>2</sub>F<sub>12</sub>·4MeCN (MW 1221.7347): C, 43.26; H, 5.28; N, 22.93 **Found:** C, 43.48; H, 5.32; N, 22.34.

Synthesis of bis[2,6-di(quinolin-8-yl)pyridine]Ni(II) hexafluorophosphate (**3**)

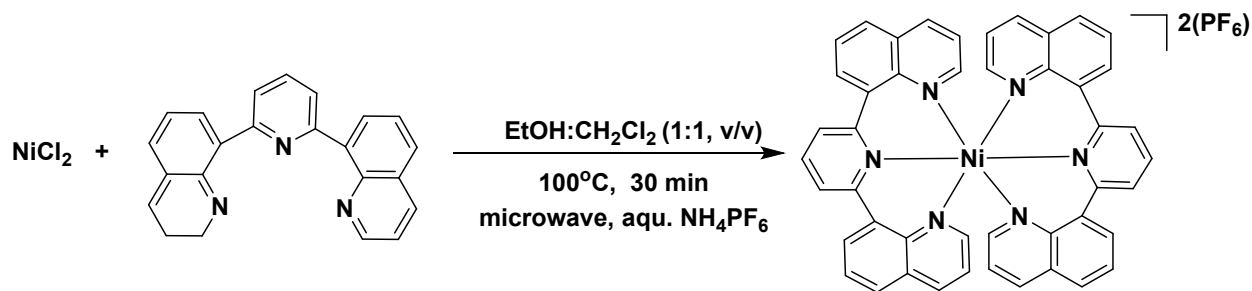

A microwave vial equipped with a magnetic stir bar was charged with  $\text{NiCl}_2$  (100 mg, 0.77 mmol, 1 equiv.) in 15 mL  $\text{EtOH}:\text{CH}_2\text{Cl}_2$  (1:1, v/v) to get a pale yellow suspension. The resulting suspension was sonicated for 10 minutes to get a clear yellow solution. To this solution BQP (514 mg, 1.54 mmol, 2 equiv.) was added while the colour immediately changed to greenish-yellow. The reaction mixture was left to stir at  $100^\circ\text{C}$  for 30 minutes to obtain a dark yellow solution after which time it was concentrated under reduced pressure to  $\sim 5$  mL to give a pale orange suspension. The chloride salt was metathesized to the  $\text{PF}_6$  salt by addition of an aliquot of saturated aqueous  $\text{KPF}_6$  solution to the suspension. The resulting pale orange solid was then filtered out, washed with water (3 x 20 mL) and dried under vacuum. Crude yield: 723 mg. Crystals suitable for X-ray diffraction study were grown by vapour diffusion of diethylether into an acetonitrile solution of the title compound. The pale orange crystals were formed after 12 h (yield = 562 mg, 72%). M.P. –  $180^\circ\text{C}$  (dec.). Rf: 0.32 (7:1, v/v acetonitrile/aliquot of  $\text{KNO}_3$  saturated water on silica).  $^1\text{H}$  NMR (500 MHz,  $\text{CD}_3\text{CN}$ )  $\delta$  (ppm): 46.82 (1H), 43.06 (1H), 31.68 (2H), 22.07 (1H), 14.49 (2H), 11.27 (2H), 6.76 (2H), 2.09 (3H).  $^{13}\text{C}$  NMR (125 MHz,  $\text{CD}_3\text{CN}$ )  $\delta$  (ppm): 207.42, 139.63, 79.14, 78.88, 78.62, 66.21 and 30.83 (some peaks are missing due to paramagnetic nature of the complex). HR ESI+ MS:  $[\text{M}-\text{PF}_6]^+$  Calculated: ( $\text{C}_{46}\text{H}_{30}\text{N}_6\text{F}_6\text{PNi}$ ) 869.1527; Found: 869.1589 (70%). **Anal. Calcd** for  $\text{C}_{46}\text{H}_{30}\text{N}_6\text{NiP}_2\text{F}_{12}\cdot 2\text{H}_2\text{O}$  (MW 1015.3924): C, 52.55; H, 3.26; N, 7.99 **Found**: C, 52.99; H, 3.20; N, 8.16.

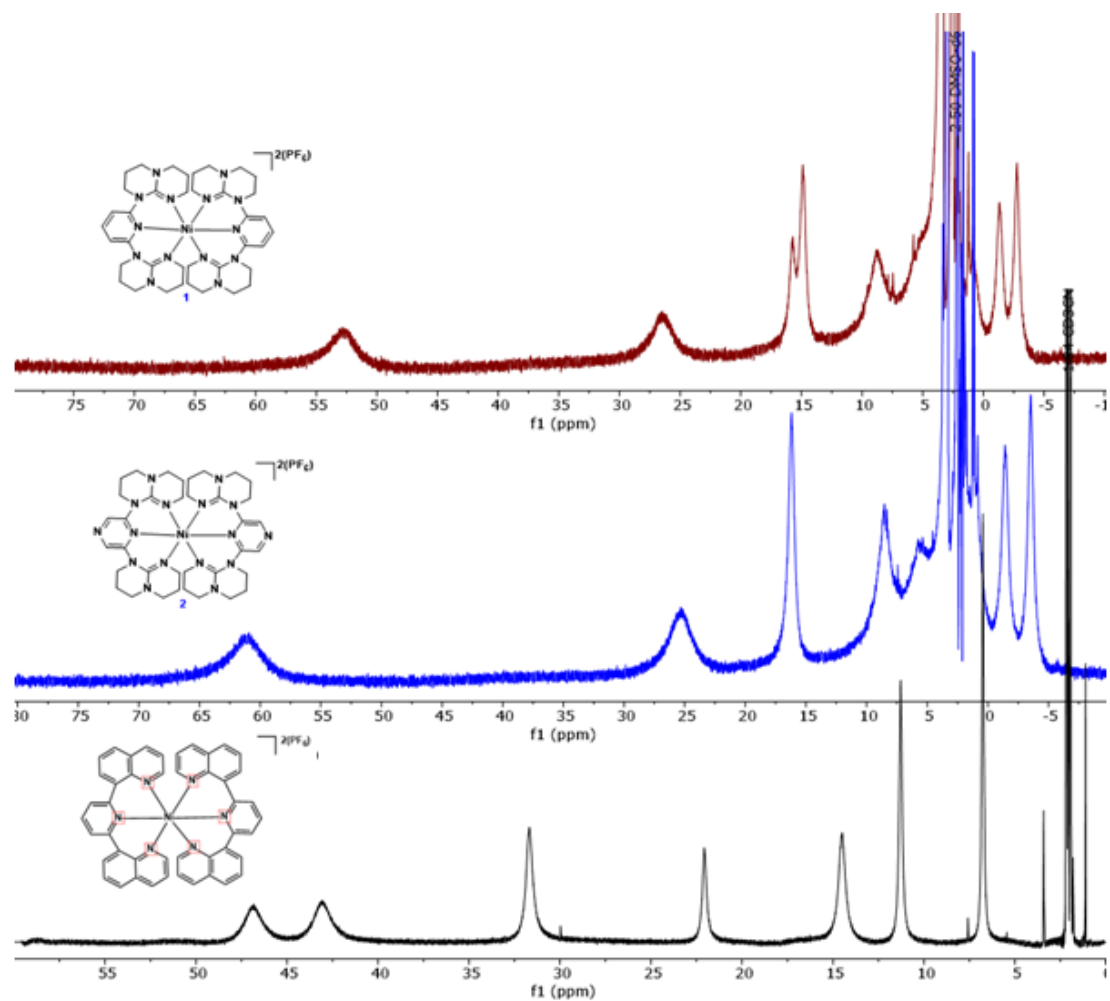

**Figure S1.** Stacked <sup>1</sup>H NMR spectra of **1**, **2** in DMSO-d<sub>6</sub> and **3** in CD<sub>3</sub>CN at room temperature in 500 MHz.

### X-ray diffraction studies

X-ray crystallographic data were collected from a single crystal sample, which was mounted on a loop fiber. Data were collected using a Bruker diffractometer equipped with a Bruker APEX-II CCD detector, a Kappa goniometer and a Mo-K<sub>α</sub> source ( $\lambda = 0.71073 \text{ \AA}$ ) at 150(2) K for **1** and 100(2) K for **2** and **3**. The crystal-to-detector distance was 4.0 cm, and the data collection was carried out in 1024 x 1024 pixel mode. The initial unit cell parameters were determined by a least-

squares fit of the angular setting of strong reflections, collected by a 180.0 degree scan in 180 frames over three different parts of the reciprocal space.

The diffraction quality of the crystals were checked, revealing in some cases poor diffraction with a large amount of diffuse scattering, signaling extensive crystal disorder. Data collection, cell refinement and data reduction were done using APEX2<sup>2</sup> and SAINT.<sup>3</sup> Absorption corrections were applied using SADABS.<sup>4</sup> Structures were solved by direct methods using SHELXS2012 and refined on  $F^2$  by full-matrix least squares using SHELXL2012.<sup>5</sup> All non-hydrogen atoms were refined anisotropically. Hydrogen atoms were refined isotropic on calculated positions using a riding model. For complex **1**, atom C18 in the hpp moiety was found to be disordered over two positions. This positional disorder was taken into account for modelling with a 1:1 occupancy of the same atom. The minor positional disorders associated with the P and F atoms in PF<sub>6</sub> anions or C and N atoms of the cosolvated acetonitrile molecules either in **1**, **2** or **3** were not taken into account for modelling.

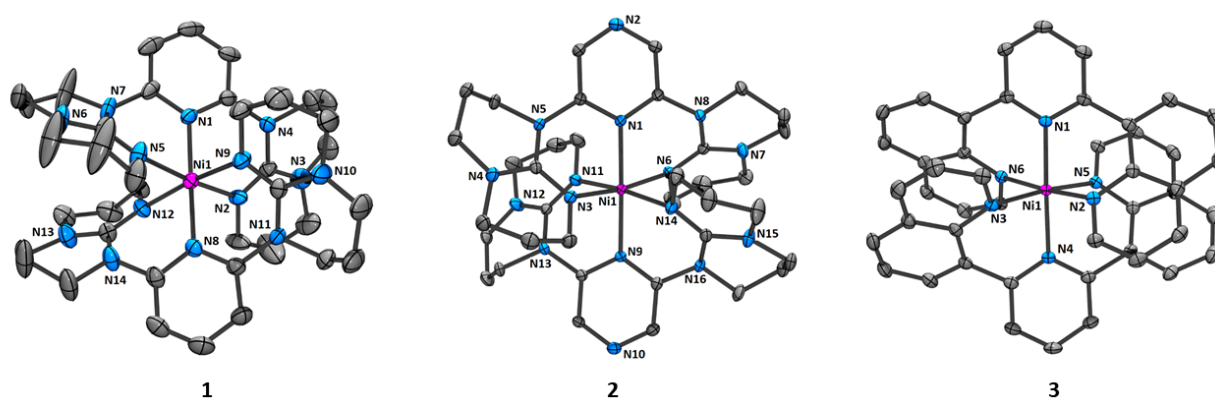

**Figure S2.** ORTEP view of complexes **1-3**. Hydrogen atoms anions and cocrystallized acetonitrile molecules are not shown for clarity. Ellipsoids correspond to a 50% probability level.

**Table S1.** Crystallographic data of complexes **1-3**.

| compound                         | <b>1</b>                                                                                                          | <b>2</b>                                                                                                          | <b>3</b>                                                                                                            |
|----------------------------------|-------------------------------------------------------------------------------------------------------------------|-------------------------------------------------------------------------------------------------------------------|---------------------------------------------------------------------------------------------------------------------|
| CCDC number                      | 2237517                                                                                                           | 2237518                                                                                                           | 2237519                                                                                                             |
| empirical formula                | C <sub>38</sub> H <sub>54</sub> N <sub>14</sub> F <sub>12</sub> P <sub>2</sub> Ni·C <sub>2</sub> H <sub>3</sub> N | C <sub>36</sub> H <sub>52</sub> N <sub>16</sub> F <sub>12</sub> P <sub>2</sub> Ni·C <sub>2</sub> H <sub>3</sub> N | C <sub>46</sub> H <sub>30</sub> N <sub>6</sub> F <sub>12</sub> P <sub>2</sub> Ni·2(C <sub>2</sub> H <sub>3</sub> N) |
| fw                               | 1096.65                                                                                                           | 1098.64                                                                                                           | 1097.52                                                                                                             |
| cryst syst                       | Orthorhombic                                                                                                      | Orthorhombic                                                                                                      | Orthorhombic                                                                                                        |
| space group                      | Pna2(1)                                                                                                           | Pna2(1)                                                                                                           | Pbca                                                                                                                |
| a [Å]                            | 23.7720(14)                                                                                                       | 23.253(4)                                                                                                         | 12.757(5)                                                                                                           |
| b [Å]                            | 14.0221(8)                                                                                                        | 14.073(3)                                                                                                         | 15.419(6)                                                                                                           |
| c [Å]                            | 13.8462(9)                                                                                                        | 13.729(3)                                                                                                         | 46.854(16)                                                                                                          |
| α [°]                            | 90                                                                                                                | 90                                                                                                                | 90                                                                                                                  |
| β [°]                            | 90                                                                                                                | 90                                                                                                                | 90                                                                                                                  |
| γ [°]                            | 90                                                                                                                | 90                                                                                                                | 90                                                                                                                  |
| vol [Å] <sup>3</sup>             | 4615.4(5)                                                                                                         | 4492.9(15)                                                                                                        | 9216(6)                                                                                                             |
| Z                                | 4                                                                                                                 | 4                                                                                                                 | 8                                                                                                                   |
| ρ (calc) [Mg/m <sup>3</sup> ]    | 1.578                                                                                                             | 1.624                                                                                                             | 1.582                                                                                                               |
| μ [cm <sup>-1</sup> ]            | 0.589                                                                                                             | 0.607                                                                                                             | 0.587                                                                                                               |
| F(000)                           | 2272                                                                                                              | 2272                                                                                                              | 4464                                                                                                                |
| cryst                            | magenta, block                                                                                                    | brown, block                                                                                                      | orange, block                                                                                                       |
| cryst size [mm <sup>3</sup> ]    | 0.20 × 0.18 × 0.14                                                                                                | 0.16 × 0.12 × 0.10                                                                                                | 0.16 × 0.12 × 0.12                                                                                                  |
| θ range                          | 2.067 – 28.324°                                                                                                   | 2.072 – 28.318°                                                                                                   | 2.117 – 28.415°                                                                                                     |
| reflns collected                 | 59351                                                                                                             | 125442                                                                                                            | 193545                                                                                                              |
| indep reflns (R <sub>int</sub> ) | 11414 (4.29)                                                                                                      | 11137 (7.13)                                                                                                      | 11490 (11.40)                                                                                                       |
| max/min transm                   | 0.746 / 0.640                                                                                                     | 0.706 / 0.648                                                                                                     | 0.732 / 0.571                                                                                                       |
| data/restraints/para             | 10897 / 4 / 653                                                                                                   | 10706 / 1 / 633                                                                                                   | 9569 / 0 / 661                                                                                                      |
| ms                               |                                                                                                                   |                                                                                                                   |                                                                                                                     |
| final R indices                  | R1 = 0.0479,                                                                                                      | R1 = 0.0288,                                                                                                      | R1 = 0.0447,                                                                                                        |
| [I > 2σ(I)]                      | wR2 = 0.1241                                                                                                      | wR2 = 0.0756                                                                                                      | wR2 = 0.1139                                                                                                        |
| R indices                        | R1 = 0.0499,                                                                                                      | R1 = 0.0302,                                                                                                      | R1 = 0.0555,                                                                                                        |
| (all data)                       | wR2 = 0.1257                                                                                                      | wR2 = 0.0761                                                                                                      | wR2 = 0.1204                                                                                                        |

<sup>a</sup>R1(F) based on observed reflections with I>2σ(I) for **2**; wR(F<sup>2</sup>) and GoF(F<sup>2</sup>) based on all data for all compounds.



| Complex             | Bond Length         |                 |                | Angle       |                 |                |
|---------------------|---------------------|-----------------|----------------|-------------|-----------------|----------------|
|                     |                     | Obs.<br>(X-ray) | Calc.<br>(DFT) |             | Obs.<br>(X-ray) | Calc.<br>(DFT) |
| Complex<br><b>1</b> | Ni1-N1              | 2.057(3)        | 2.13236        | N2-Ni1-N5   | 172.96(17)      | 169.649        |
|                     | Ni1-N2              | 2.072(4)        | 2.13234        | N9-Ni1-N12  | 172.66(15)      | 169.646        |
|                     | Ni1-N5              | 2.073(4)        | 2.14364        | N1-Ni1-N2   | 87.08(14)       | 85.978         |
|                     | Ni1-N8              | 2.054(3)        | 2.13655        | N1-Ni1-N5   | 86.03(16)       | 83.733         |
|                     | Ni1-N9              | 2.073(4)        | 2.13647        | N8-Ni1-N9   | 86.73(14)       | 85.977         |
|                     | Ni1-N12             | 2.090(4)        | 2.14367        | N8-Ni1-N12  | 86.03(14)       | 83.730         |
|                     | Complex<br><b>2</b> | Ni1-N1          | 2.0426(18)     | 2.13584     | N3-Ni1-N6       | 171.83(8)      |
| Ni1-N3              |                     | 2.081(2)        | 2.13583        | N11-Ni1-N14 | 172.87(8)       | 169.325        |
| Ni1-N6              |                     | 2.086(2)        | 2.14643        | N1-Ni1-N3   | 86.45(8)        | 85.863         |
| Ni1-N9              |                     | 2.0501(18)      | 2.12354        | N1-Ni1-N6   | 85.50(8)        | 83.509         |
| Ni1-N11             |                     | 2.072(2)        | 2.12345        | N9-Ni1-N11  | 87.83(8)        | 85.866         |
| Ni1-N14             |                     | 2.073(2)        | 2.14647        | N9-Ni1-N14  | 85.29(8)        | 83.511         |
| Complex<br><b>3</b> | Ni1-N1              | 2.0614(16)      | 2.16609        | N2-Ni1-N6   | 175.27(6)       | 173.719        |
|                     | Ni1-N2              | 2.0993(17)      | 2.16612        | N3-Ni1-N5   | 173.91(6)       | 173.727        |
|                     | Ni1-N3              | 2.1150(17)      | 2.16617        | N1-Ni1-N2   | 88.07(6)        | 86.864         |
|                     | Ni1-N4              | 2.0660(17)      | 2.16616        | N1-Ni1-N6   | 87.34(6)        | 86.863         |
|                     | Ni1-N5              | 2.1336(17)      | 2.11858        | N3-Ni1-N4   | 86.82(7)        | 86.859         |
|                     | Ni1-N6              | 2.1089(17)      | 2.11848        | N4-Ni1-N4   | 87.26(7)        | 86.860         |

**Table S2.** Comparison of bond distances and angles in **2**.

### Computational details

All calculations were performed using Gaussian 16 revision C.01 suite of programs employing the DFT method, the Becke three-parameter hybrid functional, Lee-Yang-Parr's gradient-corrected correlation functional (B3LYP), singlet ground state geometry optimizations for complex **1**, **2** and **3** were carried out at the R(B3LYP) whereas triplet optimization were carried out by using U(B3LYP) in MeCN. The basis set used for C, H, N, F atoms are 6-31g(d,p) along with SBKJC VDZ ECP for Ni(IV) ion. Vertical electronic excitations based on the (R)B3LYP- and (U)B3LYP-optimized geometries were also computed for the complexes mentioned (not shown here due to space limitation), using the TD-DFT formalism in solvents like acetonitrile and chloroform using conductor-like polarizable continuum model (CPCM).

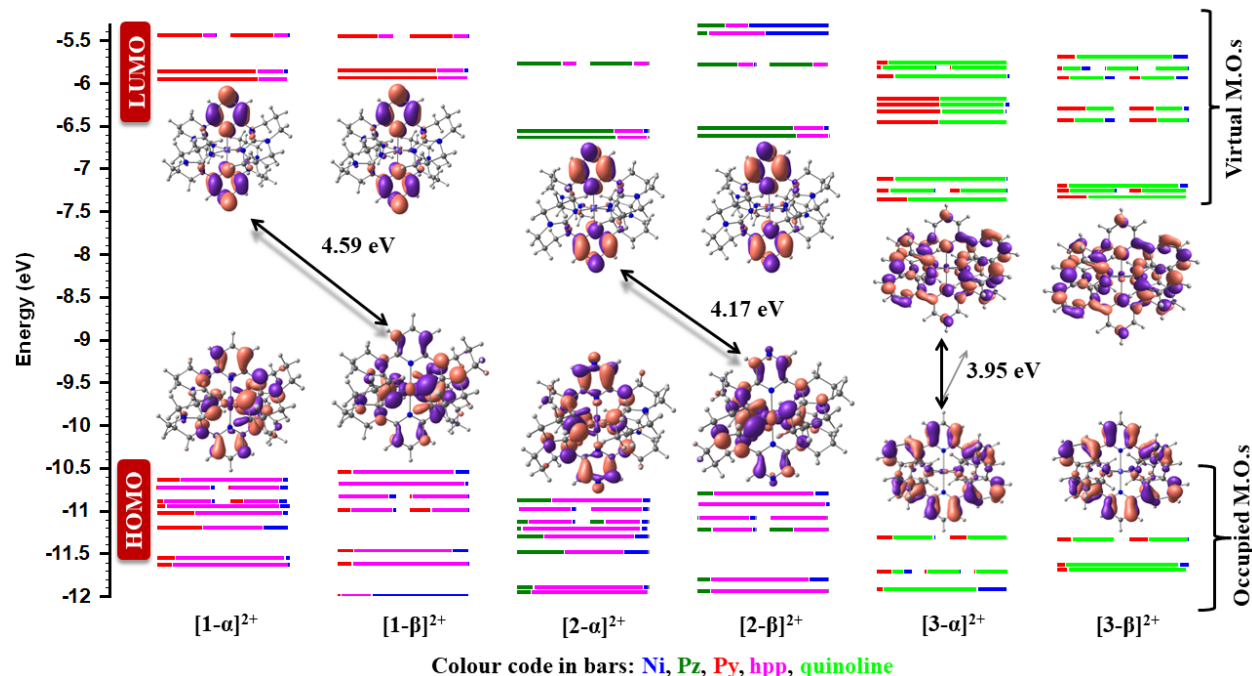

**Figure S3.** Calculated frontier M.O. energies of the modeled complexes **1**, **2** and **3** obtained from DFT(B3LYP/SBKJC VDZ ECP [Ni] 6-31G\*\* [C,H,N,F] with CPCM (CH<sub>3</sub>CN) and 0.05 eV of threshold of degeneracy.

**Table S3.** Electrochemical data for **L1**, **L2**, **L3**, **1** - **3**.

| Compound                                                                           | $E_{1/2}(\text{ox})^a / \text{V}$ |                            | $E_{1/2}(\text{red})^a / \text{V}$ |                          | $\Delta E_{1/2} / \text{V}$ |      |
|------------------------------------------------------------------------------------|-----------------------------------|----------------------------|------------------------------------|--------------------------|-----------------------------|------|
| <b>L1</b> (dgpy) <sup>b</sup>                                                      | 1.11<br>(308)                     | 0.77<br>(irr) <sup>c</sup> | ----                               |                          | ----                        |      |
| <b>L2</b> (dgpz) <sup>b</sup>                                                      | 1.14<br>(189)                     | 0.77<br>(irr) <sup>c</sup> | -1.99 (irr) <sup>c</sup>           |                          | 2.76                        |      |
| <b>L3</b> (BQP)                                                                    | ----                              | 1.67<br>(irr) <sup>c</sup> | -2.11 (irr) <sup>c</sup>           | -2.32 (irr) <sup>c</sup> | 3.78                        |      |
| <b>1</b>                                                                           | 1.53<br>(irr) <sup>c</sup>        | 0.71<br>(100)              | -0.97 (310)                        | -2.12 (irr) <sup>c</sup> |                             | 1.72 |
| <b>2</b>                                                                           | 1.69<br>(110)                     | 0.92<br>(100)              | -0.89 (254)                        | -1.73 (irr) <sup>c</sup> | -2.35 (310) <sup>c</sup>    | 1.81 |
| <b>3</b>                                                                           | 1.84<br>(122)                     | 1.13<br>(irr) <sup>c</sup> | -1.12 (irr) <sup>c</sup>           | -2.04 (irr) <sup>c</sup> | -2.34 (irr) <sup>c</sup>    | 2.58 |
| [Ni(3-Pytpy) <sub>2</sub> ] <sup>2+</sup> , <b>R1</b> <sup>d</sup>                 | 1.73 (irr) <sup>c</sup>           |                            | -1.18 (71)                         | -1.39 (98)               | -1.93 (138)                 | 2.91 |
| [Ni( <sup>i</sup> Bu <sub>3</sub> tpy)(Mes)] <sup>+</sup> , <b>R2</b> <sup>e</sup> | 1.46                              |                            | -1.22 (66)                         | -1.78(67)                | -2.54 (irr) <sup>c</sup>    | 2.68 |
| [Ni(tpy)(Mes)] <sup>+</sup> , <b>R3</b> <sup>e</sup>                               | 1.29                              |                            | -1.11 (61)                         | -1.62(60)                | -2.4 (irr) <sup>c</sup>     | 2.4  |
| [Ni(toltpy)(Mes)] <sup>+</sup> , <b>R4</b> <sup>e</sup>                            | 1.28                              |                            | -1.09 (64)                         | -1.63(63)                | -2.42 (irr) <sup>c</sup>    | 2.37 |
| [Ni(Cltpy)(Mes)] <sup>+</sup> , <b>R5</b> <sup>e</sup>                             | 1.47                              |                            | -1.02 (64)                         | -1.59(63)                | -2.42 (irr) <sup>c</sup>    | 2.49 |
| [Ni(4,4',4''-Butpy)(CF <sub>3</sub> ) <sub>2</sub> ], <b>R6</b> <sup>f</sup>       | 0.68 (irr) <sup>c</sup>           |                            | -1.34<br>(~100)                    | -1.61<br>(~100)          | -1.82 (irr) <sup>c</sup>    | 2.02 |

<sup>a</sup>Potentials are in volts vs. SCE for acetonitrile solutions, 0.1 M in [*n*-Bu<sub>4</sub>N]PF<sub>6</sub>, recorded at 25 ± 1 °C at a sweep rate of 100 mVs<sup>-1</sup> for cyclic voltammetry. The difference between cathodic and anodic peak potentials ( $\Delta E_{1/2}$  in mV) is given in parentheses. <sup>b</sup>From ref <sup>6</sup>., <sup>c</sup>Irreversible; oxidation potential is given for anodic wave, while reduction potential is given for cathodic wave. <sup>d</sup>From ref <sup>7</sup>. <sup>e</sup>From ref <sup>8</sup>. <sup>f</sup>From ref <sup>9</sup>. (redox potentials for **R2-R6** has been calibrated vs SCE,  $\Delta E_{1/2}$  for R7 was calculated by eye-estimation in absence of a tabulated data).

## DFT Calculations:

**Table S4.** UV-vis absorption data of **L1-L3**, **1-3** and some benchmark complexes

| Compound                                                        | $\lambda_{\max}$ , nm ( $\epsilon \times 10^3$ , M <sup>-1</sup> cm <sup>-1</sup> ) |
|-----------------------------------------------------------------|-------------------------------------------------------------------------------------|
| <b>L1 (dgyy)<sup>a</sup></b>                                    | 228 (29.0), 311 (12.8)                                                              |
| <b>L2 (dgpz)<sup>a</sup></b>                                    | 224 (26.9), 340 (14.1)                                                              |
| <b>L3 (BQP)</b>                                                 | 213 (72.9), 227 (70.8), 295 sh (18.9), 307 (20.2)                                   |
| <b>1</b>                                                        | 224 (55.36), 258 sh (26.27), 309 (16.68)                                            |
| <b>2</b>                                                        | 225 (59.86), 263 sh (25.99), 344 (17.86)                                            |
| <b>3</b>                                                        | 204 (131.0), 229 sh (65.74), 321 sh (25.25), 332 (28.14), 354 sh (14.58)            |
| <b>[Ni(3-Pytpy)<sub>2</sub>]<sup>2+</sup>, R1<sup>b</sup></b>   | 249(23), 284(48), 315(17), 327(17), 341(15)                                         |
| <b>[Ni(Bu<sub>3</sub>tpy)(Mes)]<sup>+</sup>, R2<sup>c</sup></b> | 324(17.4), 335(21.4), 399(2.7), 448(2.8), 487 sh(1.5)                               |
| <b>[Ni(tpy)(Mes)]<sup>+</sup>, R3<sup>c</sup></b>               | 324(14.1), 337(18.4), 401(2.3), 452(2.4), 487 sh(1.1)                               |
| <b>[Ni(toltpy)(Mes)]<sup>+</sup>, R4<sup>c</sup></b>            | 337(20.3), 420(2.2), 458(2.3), 505 sh (1.1)                                         |
| <b>[Ni(Cltpy)(Mes)]<sup>+</sup>, R5<sup>c</sup></b>             | 323(16.8), 332(20.3), 392(2.7), 457(2.8), 480 sh (1.6)                              |

<sup>a</sup>data in dry acetonitrile at room temperature. <sup>a</sup>From ref <sup>6</sup>. <sup>b</sup>From ref <sup>7</sup>. <sup>c</sup>From ref <sup>8</sup>.

**Table S5.** Selected Transitions from TD-DFT calculations of [**1**]<sup>2+</sup> in the Triplet Ground State (b3lyp/SBKJC-VDZ[Ni]6-31G\*\*[C,H,N], CPCM (CH<sub>3</sub>CN)).

| state | $\lambda$ /nm | $\lambda$ /nm ( $\epsilon \times 10^3$ M <sup>-1</sup> cm <sup>-1</sup> ) [expt.] | f      | Major transition(s)                                                                             | character                     |
|-------|---------------|-----------------------------------------------------------------------------------|--------|-------------------------------------------------------------------------------------------------|-------------------------------|
| 90    | 238           | 224 (55.36)                                                                       | 0.3648 | H-9(A)->L+2(A) (19%),<br>H-8(A)->L+3(A) (26%),<br>H-7(B)->L+2(B) (15%),<br>H-6(B)->L+3(B) (21%) | HPP( $\pi$ ) to Py( $\pi^*$ ) |
| 72    | 250           | 258 sh (26.27)                                                                    | 0.2804 | H-6(A)->L+3(A) (15%),<br>H-5(B)->L+2(B) (20%),<br>H-4(B)->L+3(B) (10%)                          | HPP( $\pi$ ) to Py( $\pi^*$ ) |
| 13    | 314           | 309 (16.68)                                                                       | 0.0816 | H-3(A)->L+1(A) (11%),<br>H-2(A)->L (A) (10%),<br>H-1(A)->L (A) (11%),<br>H (B)->L+1(B) (35%)    | HPP( $\pi$ ) to Py( $\pi^*$ ) |

**Table S6.** Selected Transitions from TD-DFT calculations of [2]<sup>2+</sup> in the Triplet Ground State (b3lyp/SBKJC-VDZ[Ni]6-31G\*\*[C,H,N], CPCM (CH<sub>3</sub>CN)).

| state | $\lambda/\text{nm}$ | $\lambda/\text{nm}$ ( $\epsilon \times 10^3$<br>$\text{M}^{-1}\text{cm}^{-1}$ ) [expt.] | f      | Major transition(s)                                                  | character                                                                          |
|-------|---------------------|-----------------------------------------------------------------------------------------|--------|----------------------------------------------------------------------|------------------------------------------------------------------------------------|
| 100   | 238                 | 225 (59.86)                                                                             | 0.1104 | H-7(A)->L+2(A) (16%),<br>H-10(B)->L+3(B) (10%)                       | HPP( $\pi$ ) to Pz( $\pi^*$ )<br>(major) + Pz( $\pi$ ) to<br>Pz( $\pi^*$ ) (minor) |
| 76    | 259                 | 263 sh (25.99)                                                                          | 0.1491 | H-4(A)->L+3(A) (12%),<br>H-4(B)->L+2(B) (16%)                        | HPP( $\pi$ ) to Pz( $\pi^*$ )                                                      |
| 29    | 324                 | 344 (17.86)                                                                             | 0.1584 | H-6(A)->L (A) (29%),<br>H-3(A)->L+1(A) (27%),<br>H-5(B)->L (B) (12%) | HPP( $\pi$ ) to Pz( $\pi^*$ )<br>(major) + Pz( $\pi$ ) to<br>Pz( $\pi^*$ ) (minor) |

**Table S7.** Selected Transitions from TD-DFT calculations of [3]<sup>2+</sup> in the Triplet Ground State (b3lyp/SBKJC-VDZ[Ni]6-31G\*\*[C,H,N], CPCM (CH<sub>3</sub>CN)).

| state | $\lambda/\text{nm}$ | $\lambda/\text{nm}$ ( $\epsilon \times 10^3$<br>$\text{M}^{-1}\text{cm}^{-1}$ ) [expt.] | f      | Major transition(s)                                                                           | character                                                                                                                                                         |
|-------|---------------------|-----------------------------------------------------------------------------------------|--------|-----------------------------------------------------------------------------------------------|-------------------------------------------------------------------------------------------------------------------------------------------------------------------|
| ----  | ----                | 204 (131.0)                                                                             | ----   | ----                                                                                          | ----                                                                                                                                                              |
| ----  | ----                | 229 sh (65.74)                                                                          | ----   | ----                                                                                          | ----                                                                                                                                                              |
| 56    | 299                 | 321 sh (25.25)                                                                          | 0.2324 | H-7(A)->L (A) (27%),<br>H-6(A)->L+2(A) (14%),<br>H-5(B)->L (B) (23%),<br>H-4(B)->L+2(B) (16%) | quinoline( $\pi$ ) to<br>quinoline( $\pi^*$ )                                                                                                                     |
| 18    | 355                 | 332 (28.14)                                                                             | 0.4646 | H (A)->L+1(A) (18%),<br>H-1(B)->L (B) (39%),<br>H (B)->L+1(B) (11%)                           | quinoline( $\pi$ ) to<br>quinoline( $\pi^*$ )                                                                                                                     |
| 11    | 368                 | 354 sh (14.58)                                                                          | 0.2746 | H-2(A)->L (A) (25%),<br>H-1(A)->L (A) (56%)                                                   | quinoline( $\pi$ ) to<br>quinoline( $\pi^*$ )<br>(major) + Py( $\pi$ ) to<br>quinoline( $\pi^*$ )<br>(minor) + Ni( $d\pi$ ) to<br>quinoline( $\pi^*$ )<br>(minor) |

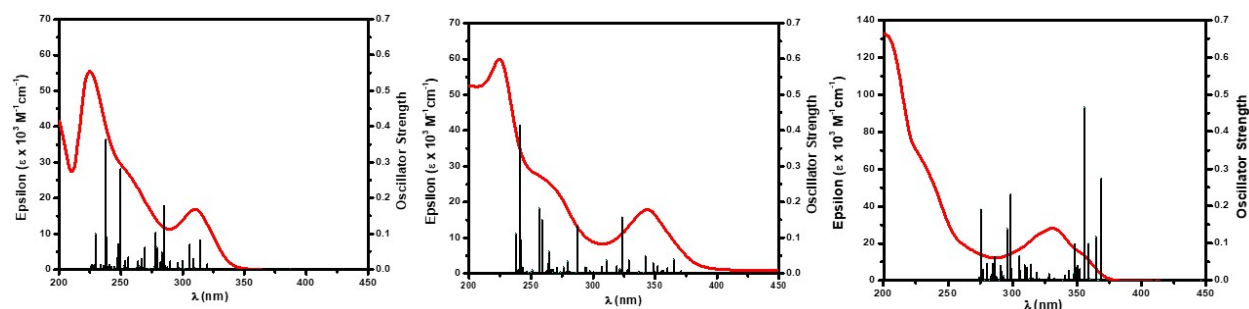

**Figure S4.** Overlay of experimental (curved line) absorption spectra and TD-DFT calculated oscillator strengths (black bars) at different wavelengths of **1**, **2** and **3** at ambient temperature in acetonitrile.

**Table S8.** List of non-bonded interactions between DNA and complex [**1**]<sup>2+</sup>

<----- ATOM 1 ----->      <----- ATOM 2 ----->

| Atom no | Atom name | Res name | Res no | Chain | Atom no | Atom name | Res name | Res no | Chain | Distance |       |
|---------|-----------|----------|--------|-------|---------|-----------|----------|--------|-------|----------|-------|
| 1       | 24        | C36      | UNK    | 1     | ---     | 76        | O4'      | DC     | 23    | B        | 3.706 |
| 2       | 24        | C36      | UNK    | 1     | ---     | 75        | C4'      | DC     | 23    | B        | 3.426 |
| 3       | 25        | C37      | UNK    | 1     | ---     | 74        | C5'      | DC     | 23    | B        | 3.171 |
| 4       | 24        | C36      | UNK    | 1     | ---     | 74        | C5'      | DC     | 23    | B        | 2.879 |
| 5       | 6         | N13      | UNK    | 1     | ---     | 74        | C5'      | DC     | 23    | B        | 3.652 |
| 6       | 25        | C37      | UNK    | 1     | ---     | 71        | OP1      | DC     | 23    | B        | 3.347 |
| 7       | 25        | C37      | UNK    | 1     | ---     | 70        | P        | DC     | 23    | B        | 3.841 |
| 8       | 25        | C37      | UNK    | 1     | ---     | 56        | O3'      | DG     | 22    | B        | 3.485 |
| 9       | 25        | C37      | UNK    | 1     | ---     | 55        | C3'      | DG     | 22    | B        | 3.854 |
| 10      | 26        | C38      | UNK    | 1     | ---     | 54        | O4'      | DG     | 22    | B        | 3.711 |
| 11      | 25        | C37      | UNK    | 1     | ---     | 54        | O4'      | DG     | 22    | B        | 3.399 |
| 12      | 26        | C38      | UNK    | 1     | ---     | 53        | C4'      | DG     | 22    | B        | 3.360 |
| 13      | 25        | C37      | UNK    | 1     | ---     | 53        | C4'      | DG     | 22    | B        | 3.008 |
| 14      | 26        | C38      | UNK    | 1     | ---     | 52        | C5'      | DG     | 22    | B        | 3.782 |
| 15      | 16        | C28      | UNK    | 1     | ---     | 90        | OP1      | DT     | 7     | A        | 3.155 |
| 16      | 15        | C27      | UNK    | 1     | ---     | 90        | OP1      | DT     | 7     | A        | 3.616 |
| 17      | 16        | C28      | UNK    | 1     | ---     | 89        | P        | DT     | 7     | A        | 3.856 |
| 18      | 15        | C27      | UNK    | 1     | ---     | 89        | P        | DT     | 7     | A        | 3.750 |
| 19      | 16        | C28      | UNK    | 1     | ---     | 35        | O3'      | DA     | 6     | A        | 3.487 |
| 20      | 15        | C27      | UNK    | 1     | ---     | 35        | O3'      | DA     | 6     | A        | 2.999 |
| 21      | 14        | C26      | UNK    | 1     | ---     | 35        | O3'      | DA     | 6     | A        | 3.293 |
| 22      | 15        | C27      | UNK    | 1     | ---     | 34        | C3'      | DA     | 6     | A        | 3.537 |
| 23      | 14        | C26      | UNK    | 1     | ---     | 34        | C3'      | DA     | 6     | A        | 3.569 |
| 24      | 15        | C27      | UNK    | 1     | ---     | 32        | C4'      | DA     | 6     | A        | 3.800 |

|    |    |     |     |   |     |    |     |    |   |   |       |
|----|----|-----|-----|---|-----|----|-----|----|---|---|-------|
| 25 | 14 | C26 | UNK | 1 | --- | 32 | C4' | DA | 6 | A | 3.205 |
| 26 | 15 | C27 | UNK | 1 | --- | 31 | C5' | DA | 6 | A | 3.879 |
| 27 | 14 | C26 | UNK | 1 | --- | 31 | C5' | DA | 6 | A | 3.142 |

---

**Table S9.** List of non-bonded interactions between DNA and complex [2]<sup>2+</sup>

<----- A T O M 1 ----->      <----- A T O M 2 ----->

| <----- A T O M 1 -----> |           |          |        |       | <----- A T O M 2 -----> |           |          |        |       |          |       |
|-------------------------|-----------|----------|--------|-------|-------------------------|-----------|----------|--------|-------|----------|-------|
| Atom no                 | Atom name | Res name | Res no | Chain | Atom no                 | Atom name | Res name | Res no | Chain | Distance |       |
| 1                       | 24        | C34      | UNK    | 1     | ---                     | 87        | C7       | DT     | 7     | A        | 3.806 |
| 2                       | 25        | C35      | UNK    | 1     | ---                     | 85        | O4       | DT     | 7     | A        | 3.789 |
| 3                       | 24        | C34      | UNK    | 1     | ---                     | 85        | O4       | DT     | 7     | A        | 3.386 |
| 4                       | 24        | C34      | UNK    | 1     | ---                     | 61        | N7       | DA     | 6     | A        | 3.485 |
| 5                       | 23        | C33      | UNK    | 1     | ---                     | 61        | N7       | DA     | 6     | A        | 2.879 |
| 6                       | 23        | C33      | UNK    | 1     | ---                     | 60        | C8       | DA     | 6     | A        | 3.405 |
| 7                       | 22        | C32      | UNK    | 1     | ---                     | 36        | C2'      | DA     | 5     | A        | 3.712 |
| 8                       | 21        | C31      | UNK    | 1     | ---                     | 30        | O5'      | DA     | 5     | A        | 3.873 |
| 9                       | 21        | C31      | UNK    | 1     | ---                     | 29        | OP2      | DA     | 5     | A        | 3.245 |
| 10                      | 20        | C30      | UNK    | 1     | ---                     | 29        | OP2      | DA     | 5     | A        | 2.824 |

---

**Table S10.** List of non-bonded interactions between DNA and complex [3]<sup>2+</sup>

<----- A T O M 1 ----->      <----- A T O M 2 ----->

| <----- A T O M 1 -----> |           |          |        |       | <----- A T O M 2 -----> |           |          |        |       |          |   |       |
|-------------------------|-----------|----------|--------|-------|-------------------------|-----------|----------|--------|-------|----------|---|-------|
| Atom no                 | Atom name | Res name | Res no | Chain | Atom no                 | Atom name | Res name | Res no | Chain | Distance |   |       |
| 1                       | 12        | C32      | UNK    | 1     | X                       | ---       | 116      | O4'    | DG    | 24       | B | 3.545 |
| 2                       | 15        | C35      | UNK    | 1     | X                       | ---       | 114      | C5'    | DG    | 24       | B | 3.897 |
| 3                       | 14        | C34      | UNK    | 1     | X                       | ---       | 114      | C5'    | DG    | 24       | B | 3.160 |
| 4                       | 12        | C32      | UNK    | 1     | X                       | ---       | 40       | O2     | DC    | 23       | B | 3.493 |
| 5                       | 11        | C31      | UNK    | 1     | X                       | ---       | 40       | O2     | DC    | 23       | B | 2.864 |
| 6                       | 10        | C30      | UNK    | 1     | X                       | ---       | 40       | O2     | DC    | 23       | B | 3.258 |
| 7                       | 12        | C32      | UNK    | 1     | X                       | ---       | 37       | C1'    | DC    | 23       | B | 3.866 |
| 8                       | 11        | C31      | UNK    | 1     | X                       | ---       | 37       | C1'    | DC    | 23       | B | 3.866 |
| 9                       | 10        | C30      | UNK    | 1     | X                       | ---       | 37       | C1'    | DC    | 23       | B | 3.788 |
| 10                      | 9         | C29      | UNK    | 1     | X                       | ---       | 37       | C1'    | DC    | 23       | B | 3.804 |
| 11                      | 15        | C35      | UNK    | 1     | X                       | ---       | 35       | O3'    | DC    | 23       | B | 3.367 |
| 12                      | 14        | C34      | UNK    | 1     | X                       | ---       | 35       | O3'    | DC    | 23       | B | 3.354 |

|    |    |         |   |   |     |     |        |    |   |       |
|----|----|---------|---|---|-----|-----|--------|----|---|-------|
| 13 | 13 | C33 UNK | 1 | X | --- | 35  | O3' DC | 23 | B | 3.791 |
| 14 | 17 | C37 UNK | 1 | X | --- | 33  | O4' DC | 23 | B | 3.773 |
| 15 | 10 | C30 UNK | 1 | X | --- | 33  | O4' DC | 23 | B | 3.889 |
| 16 | 9  | C29 UNK | 1 | X | --- | 33  | O4' DC | 23 | B | 3.490 |
| 17 | 8  | C28 UNK | 1 | X | --- | 33  | O4' DC | 23 | B | 3.504 |
| 18 | 7  | C27 UNK | 1 | X | --- | 33  | O4' DC | 23 | B | 3.289 |
| 19 | 17 | C37 UNK | 1 | X | --- | 32  | C4' DC | 23 | B | 3.514 |
| 20 | 9  | C29 UNK | 1 | X | --- | 32  | C4' DC | 23 | B | 3.731 |
| 21 | 8  | C28 UNK | 1 | X | --- | 32  | C4' DC | 23 | B | 3.823 |
| 22 | 1  | N3 UNK  | 1 | X | --- | 32  | C4' DC | 23 | B | 3.712 |
| 23 | 7  | C27 UNK | 1 | X | --- | 66  | N3 DG  | 22 | B | 3.118 |
| 24 | 6  | C26 UNK | 1 | X | --- | 66  | N3 DG  | 22 | B | 3.347 |
| 25 | 11 | C31 UNK | 1 | X | --- | 65  | N2 DG  | 22 | B | 3.734 |
| 26 | 10 | C30 UNK | 1 | X | --- | 65  | N2 DG  | 22 | B | 3.119 |
| 27 | 7  | C27 UNK | 1 | X | --- | 65  | N2 DG  | 22 | B | 3.509 |
| 28 | 7  | C27 UNK | 1 | X | --- | 64  | C2 DG  | 22 | B | 3.734 |
| 29 | 6  | C26 UNK | 1 | X | --- | 56  | C1' DG | 22 | B | 3.583 |
| 30 | 7  | C27 UNK | 1 | X | --- | 52  | O4' DG | 22 | B | 3.795 |
| 31 | 6  | C26 UNK | 1 | X | --- | 52  | O4' DG | 22 | B | 2.896 |
| 32 | 5  | C25 UNK | 1 | X | --- | 52  | O4' DG | 22 | B | 3.604 |
| 33 | 6  | C26 UNK | 1 | X | --- | 51  | C4' DG | 22 | B | 3.599 |
| 34 | 24 | C44 UNK | 1 | X | --- | 69  | OP1 DA | 6  | A | 3.197 |
| 35 | 23 | C43 UNK | 1 | X | --- | 69  | OP1 DA | 6  | A | 2.807 |
| 36 | 22 | C42 UNK | 1 | X | --- | 69  | OP1 DA | 6  | A | 3.798 |
| 37 | 24 | C44 UNK | 1 | X | --- | 68  | P DA   | 6  | A | 3.708 |
| 38 | 23 | C43 UNK | 1 | X | --- | 68  | P DA   | 6  | A | 3.665 |
| 39 | 25 | C45 UNK | 1 | X | --- | 97  | O3' DA | 5  | A | 3.449 |
| 40 | 24 | C44 UNK | 1 | X | --- | 97  | O3' DA | 5  | A | 2.943 |
| 41 | 23 | C43 UNK | 1 | X | --- | 97  | O3' DA | 5  | A | 3.333 |
| 42 | 25 | C45 UNK | 1 | X | --- | 94  | C4' DA | 5  | A | 3.566 |
| 43 | 7  | C27 UNK | 1 | X | --- | 151 | N2 DG  | 4  | A | 3.646 |
| 44 | 6  | C26 UNK | 1 | X | --- | 151 | N2 DG  | 4  | A | 3.508 |

---

**Table S11.** Optimized atomic coordinates obtained from DFT calculations of [1]<sup>2+</sup>

| Center<br>Number | Atomic<br>Number | Atomic<br>Type | Coordinates (Angstroms) |           |           |
|------------------|------------------|----------------|-------------------------|-----------|-----------|
|                  |                  |                | X                       | Y         | Z         |
| 1                | 28               | 0              | 0.054174                | 0.000006  | -0.000113 |
| 2                | 7                | 0              | 1.497263                | -0.369594 | -1.525835 |
| 3                | 7                | 0              | 1.497189                | 0.369420  | 1.525708  |
| 4                | 7                | 0              | -1.423449               | 0.013944  | -1.553053 |
| 5                | 7                | 0              | 0.045860                | -2.116026 | 0.295154  |
| 6                | 7                | 0              | 0.045941                | 2.115977  | -0.295208 |
| 7                | 7                | 0              | -1.423541               | -0.013877 | 1.552789  |
| 8                | 7                | 0              | 3.490467                | 1.435341  | 2.227256  |
| 9                | 7                | 0              | -2.296417               | -2.076240 | 0.867785  |
| 10               | 7                | 0              | -3.604062               | 0.618801  | -2.214469 |
| 11               | 7                | 0              | 2.369182                | -2.140345 | -0.276373 |
| 12               | 7                | 0              | -2.296286               | 2.076327  | -0.868071 |
| 13               | 7                | 0              | -3.604119               | -0.618807 | 2.214385  |
| 14               | 7                | 0              | 3.490834                | -1.435254 | -2.226897 |
| 15               | 7                | 0              | 2.369261                | 2.140125  | 0.276324  |
| 16               | 6                | 0              | 4.369867                | 3.397802  | 0.950907  |
| 17               | 1                | 0              | 5.327987                | 3.810104  | 0.628687  |
| 18               | 1                | 0              | 3.753100                | 4.228090  | 1.302102  |
| 19               | 6                | 0              | 1.260365                | 4.188777  | -0.362301 |
| 20               | 1                | 0              | 2.161879                | 4.744453  | -0.160476 |
| 21               | 6                | 0              | -4.750578               | -2.084794 | 0.640574  |
| 22               | 1                | 0              | -5.619422               | -2.729870 | 0.501639  |
| 23               | 1                | 0              | -5.085885               | -2.018580 | 2.773276  |
| 24               | 1                | 0              | -4.701924               | -1.391483 | -0.203777 |
| 25               | 6                | 0              | -1.028594               | -4.125514 | 1.045598  |
| 26               | 1                | 0              | -1.891540               | -4.627729 | 1.448531  |
| 27               | 6                | 0              | -1.056682               | -2.760508 | 0.739031  |
| 28               | 6                | 0              | -1.056567               | 2.760523  | -0.739073 |
| 29               | 6                | 0              | 3.657745                | 0.511726  | 3.359412  |
| 30               | 1                | 0              | 4.223324                | 1.036755  | 4.130648  |
| 31               | 1                | 0              | 4.252581                | -0.359129 | 3.055504  |
| 32               | 6                | 0              | -1.028443               | 4.125587  | -1.045466 |
| 33               | 1                | 0              | -1.891420               | 4.627852  | -1.448288 |
| 34               | 6                | 0              | 2.425755                | 1.265220  | 1.382270  |
| 35               | 6                | 0              | 1.191273                | 2.811421  | -0.121026 |
| 36               | 6                | 0              | -1.534307               | -1.184980 | -2.388603 |
| 37               | 1                | 0              | -2.013043               | -1.989841 | -1.818472 |
| 38               | 1                | 0              | -0.523700               | -1.521595 | -2.619068 |
| 39               | 6                | 0              | 3.666744                | -2.669310 | 0.184269  |
| 40               | 1                | 0              | 3.498899                | -3.299887 | 1.053446  |
| 41               | 1                | 0              | 4.274340                | -1.821553 | 0.518968  |
| 42               | 6                | 0              | -4.750471               | 2.084667  | -0.640509 |
| 43               | 1                | 0              | -5.619344               | 2.729708  | -0.501594 |



|    |   |   |           |           |           |
|----|---|---|-----------|-----------|-----------|
| 44 | 1 | 0 | -4.701890 | 1.391308  | 0.203771  |
| 45 | 6 | 0 | 2.425849  | -1.265346 | -1.382223 |
| 46 | 6 | 0 | 4.600129  | -2.392387 | -2.069098 |
| 47 | 1 | 0 | 5.512937  | -1.817893 | -1.867145 |
| 48 | 1 | 0 | 4.748534  | -2.903149 | -3.024121 |
| 49 | 6 | 0 | 3.666891  | 2.669001  | -0.184226 |
| 50 | 1 | 0 | 3.499165  | 3.299515  | -1.053468 |
| 51 | 1 | 0 | 4.274477  | 1.821192  | -0.518812 |
| 52 | 6 | 0 | -1.533822 | 1.184794  | 2.388803  |
| 53 | 1 | 0 | -2.011645 | 1.990298  | 1.818819  |
| 54 | 1 | 0 | -0.523035 | 1.520533  | 2.619783  |
| 55 | 6 | 0 | 1.260153  | -4.188901 | 0.362247  |
| 56 | 1 | 0 | 2.161620  | -4.744620 | 0.160322  |
| 57 | 6 | 0 | 1.191127  | -2.811531 | 0.120942  |
| 58 | 6 | 0 | -3.711662 | 0.428348  | 3.243671  |
| 59 | 1 | 0 | -4.248795 | -0.001246 | 4.094719  |
| 60 | 1 | 0 | -4.320319 | 1.256740  | 2.860232  |
| 61 | 6 | 0 | -4.856800 | 1.330505  | -1.950047 |
| 62 | 1 | 0 | -5.661526 | 0.589399  | -1.916824 |
| 63 | 1 | 0 | -5.085702 | 2.018765  | -2.773205 |
| 64 | 6 | 0 | -2.420146 | 0.847023  | -1.556536 |
| 65 | 6 | 0 | 0.140371  | 4.839454  | -0.842923 |
| 66 | 1 | 0 | 0.173120  | 5.900592  | -1.055299 |
| 67 | 6 | 0 | -3.711491 | -0.427724 | -3.244414 |
| 68 | 1 | 0 | -4.247815 | 0.002620  | -4.095617 |
| 69 | 1 | 0 | -4.320898 | -1.255933 | -2.861794 |
| 70 | 6 | 0 | -2.420254 | -0.846929 | 1.556382  |
| 71 | 6 | 0 | -3.495732 | 2.930987  | -0.709576 |
| 72 | 1 | 0 | -3.360429 | 3.524239  | 0.195595  |
| 73 | 1 | 0 | -3.605455 | 3.623101  | -1.551795 |
| 74 | 6 | 0 | 0.140181  | -4.839471 | 0.843023  |
| 75 | 1 | 0 | 0.172865  | -5.900593 | 1.055498  |
| 76 | 6 | 0 | 1.498323  | -0.489546 | 2.715660  |
| 77 | 1 | 0 | 1.915219  | -1.464268 | 2.438986  |
| 78 | 1 | 0 | 0.460676  | -0.669320 | 2.996724  |
| 79 | 6 | 0 | -2.336661 | 0.920459  | 3.656306  |
| 80 | 1 | 0 | -2.432034 | 1.825710  | 4.258607  |
| 81 | 1 | 0 | -1.833421 | 0.166729  | 4.268743  |
| 82 | 6 | 0 | 3.658578  | -0.510986 | -3.358433 |
| 83 | 1 | 0 | 4.252663  | 0.360042  | -3.053536 |
| 84 | 1 | 0 | 4.225087  | -1.035262 | -4.129489 |
| 85 | 6 | 0 | 2.294571  | 0.085608  | 3.878460  |
| 86 | 1 | 0 | 1.783196  | 0.952529  | 4.306538  |
| 87 | 1 | 0 | 2.405561  | -0.656879 | 4.671083  |
| 88 | 6 | 0 | 1.498385  | 0.489319  | -2.715857 |
| 89 | 1 | 0 | 0.460751  | 0.668362  | -2.997410 |
| 90 | 1 | 0 | 1.914441  | 1.464341  | -2.438995 |
| 91 | 6 | 0 | 4.369795  | -3.398096 | -0.950829 |
| 92 | 1 | 0 | 5.327868  | -3.810445 | -0.628518 |

|     |   |   |           |           |           |
|-----|---|---|-----------|-----------|-----------|
| 93  | 1 | 0 | 3.753046  | -4.228365 | -1.302091 |
| 94  | 6 | 0 | -3.495800 | -2.931035 | 0.709803  |
| 95  | 1 | 0 | -3.360614 | -3.524618 | -0.195169 |
| 96  | 6 | 0 | -2.336513 | -0.920432 | -3.656470 |
| 97  | 1 | 0 | -2.432039 | -1.825667 | -4.258768 |
| 98  | 1 | 0 | -1.832688 | -0.166956 | -4.268736 |
| 99  | 6 | 0 | 4.600056  | 2.392108  | 2.069201  |
| 100 | 1 | 0 | 5.512673  | 1.817329  | 1.867163  |
| 101 | 1 | 0 | 4.748740  | 2.902885  | 3.024163  |
| 102 | 6 | 0 | -4.856940 | -1.330477 | 1.950016  |
| 103 | 6 | 0 | 2.295562  | -0.085328 | -3.878279 |
| 104 | 1 | 0 | 1.784805  | -0.952423 | -4.306742 |
| 105 | 1 | 0 | 2.406710  | 0.657290  | -4.670757 |
| 106 | 1 | 0 | -5.661581 | -0.589295 | 1.916676  |
| 107 | 1 | 0 | -3.605368 | -3.622812 | 1.552320  |

**Table S12.** Optimized atomic coordinates obtained from DFT calculations of  $[2]^{2+}$

| Center<br>Number | Atomic<br>Number | Atomic<br>Type | Coordinates (Angstroms) |           |           |
|------------------|------------------|----------------|-------------------------|-----------|-----------|
|                  |                  |                | X                       | Y         | Z         |
| 1                | 28               | 0              | 0.057583                | 0.000015  | -0.000074 |
| 2                | 7                | 0              | 1.508695                | -0.407034 | -1.513483 |
| 3                | 7                | 0              | 1.508650                | 0.406894  | 1.513402  |
| 4                | 7                | 0              | -1.425152               | -0.011654 | -1.552017 |
| 5                | 7                | 0              | 0.043174                | -2.097037 | 0.333945  |
| 6                | 7                | 0              | 0.043123                | 2.097006  | -0.333935 |
| 7                | 7                | 0              | -1.425252               | 0.011703  | 1.551821  |
| 8                | 7                | 0              | 3.498364                | 1.492126  | 2.196510  |
| 9                | 7                | 0              | -2.292725               | -2.077851 | 0.937322  |
| 10               | 7                | 0              | -3.595318               | 0.589858  | -2.252174 |
| 11               | 7                | 0              | 2.363537                | -2.179781 | -0.250888 |
| 12               | 7                | 0              | -2.292710               | 2.077864  | -0.937557 |
| 13               | 7                | 0              | -3.595376               | -0.589958 | 2.252073  |
| 14               | 7                | 0              | 3.498757                | -1.491869 | -2.196121 |
| 15               | 7                | 0              | 2.363487                | 2.179683  | 0.250905  |
| 16               | 6                | 0              | 4.320146                | 3.494286  | 0.939018  |
| 17               | 1                | 0              | 5.267530                | 3.935984  | 0.624630  |
| 18               | 1                | 0              | 3.675280                | 4.305973  | 1.283275  |
| 19               | 6                | 0              | 1.186627                | 4.187713  | -0.424803 |
| 20               | 1                | 0              | 2.065933                | 4.790921  | -0.245884 |
| 21               | 6                | 0              | -4.749619               | -2.132002 | 0.754997  |
| 22               | 1                | 0              | -5.611482               | -2.793773 | 0.657848  |
| 23               | 1                | 0              | -5.048205               | -1.985730 | 2.888917  |
| 24               | 1                | 0              | -4.727092               | -1.472531 | -0.117270 |
| 25               | 6                | 0              | -0.981632               | -4.110911 | 1.087635  |
| 26               | 1                | 0              | -1.824216               | -4.650839 | 1.492009  |

|    |   |   |           |           |           |
|----|---|---|-----------|-----------|-----------|
| 27 | 6 | 0 | -1.052821 | -2.739256 | 0.789034  |
| 28 | 6 | 0 | -1.052857 | 2.739252  | -0.789024 |
| 29 | 6 | 0 | 3.681956  | 0.569378  | 3.327917  |
| 30 | 1 | 0 | 4.259055  | 1.094316  | 4.090069  |
| 31 | 1 | 0 | 4.271098  | -0.301718 | 3.015067  |
| 32 | 6 | 0 | -0.981647 | 4.110943  | -1.087515 |
| 33 | 1 | 0 | -1.824253 | 4.650885  | -1.491848 |
| 34 | 6 | 0 | 2.431440  | 1.309270  | 1.361778  |
| 35 | 6 | 0 | 1.175364  | 2.808003  | -0.159846 |
| 36 | 6 | 0 | -1.535158 | -1.232503 | -2.357368 |
| 37 | 1 | 0 | -2.021252 | -2.020232 | -1.769553 |
| 38 | 1 | 0 | -0.524039 | -1.577396 | -2.572947 |
| 39 | 6 | 0 | 3.650146  | -2.746528 | 0.202508  |
| 40 | 1 | 0 | 3.470722  | -3.372378 | 1.072933  |
| 41 | 1 | 0 | 4.282116  | -1.915451 | 0.532695  |
| 42 | 6 | 0 | -4.749668 | 2.131702  | -0.754954 |
| 43 | 1 | 0 | -5.611599 | 2.793365  | -0.657813 |
| 44 | 1 | 0 | -4.727178 | 1.472085  | 0.117198  |
| 45 | 6 | 0 | 2.431563  | -1.309299 | -1.361685 |
| 46 | 6 | 0 | 4.571903  | -2.494840 | -2.058731 |
| 47 | 1 | 0 | 5.508201  | -1.955648 | -1.870629 |
| 48 | 1 | 0 | 4.684052  | -3.008161 | -3.017259 |
| 49 | 6 | 0 | 3.650110  | 2.746338  | -0.202551 |
| 50 | 1 | 0 | 3.470688  | 3.372177  | -1.072984 |
| 51 | 1 | 0 | 4.282007  | 1.915208  | -0.532758 |
| 52 | 6 | 0 | -1.534941 | 1.232412  | 2.357424  |
| 53 | 1 | 0 | -2.020430 | 2.020543  | 1.769642  |
| 54 | 1 | 0 | -0.523724 | 1.576790  | 2.573379  |
| 55 | 6 | 0 | 1.186630  | -4.187762 | 0.424875  |
| 56 | 1 | 0 | 2.065911  | -4.791000 | 0.245934  |
| 57 | 6 | 0 | 1.175393  | -2.808051 | 0.159877  |
| 58 | 6 | 0 | -3.702715 | 0.490302  | 3.247882  |
| 59 | 1 | 0 | -4.233055 | 0.085061  | 4.114652  |
| 60 | 1 | 0 | -4.317610 | 1.302269  | 2.840692  |
| 61 | 6 | 0 | -4.843089 | 1.328214  | -2.035310 |
| 62 | 1 | 0 | -5.657203 | 0.598704  | -1.987053 |
| 63 | 1 | 0 | -5.047956 | 1.985871  | -2.888917 |
| 64 | 6 | 0 | -2.418378 | 0.826349  | -1.589772 |
| 65 | 7 | 0 | 0.123318  | 4.817388  | -0.895151 |
| 66 | 6 | 0 | -3.702489 | -0.489920 | -3.248526 |
| 67 | 1 | 0 | -4.232235 | -0.084129 | -4.115415 |
| 68 | 1 | 0 | -4.317888 | -1.301828 | -2.841995 |
| 69 | 6 | 0 | -2.418439 | -0.826327 | 1.589643  |
| 70 | 6 | 0 | -3.482747 | 2.958256  | -0.832214 |
| 71 | 1 | 0 | -3.355291 | 3.579357  | 0.055101  |
| 72 | 1 | 0 | -3.561494 | 3.620991  | -1.700548 |
| 73 | 7 | 0 | 0.123331  | -4.817387 | 0.895287  |
| 74 | 6 | 0 | 1.516047  | -0.437107 | 2.715446  |
| 75 | 1 | 0 | 1.926627  | -1.416883 | 2.447312  |

|     |   |   |           |           |           |
|-----|---|---|-----------|-----------|-----------|
| 76  | 1 | 0 | 0.479851  | -0.607654 | 3.008016  |
| 77  | 6 | 0 | -2.327949 | 1.000681  | 3.637065  |
| 78  | 1 | 0 | -2.423660 | 1.922852  | 4.212910  |
| 79  | 1 | 0 | -1.817165 | 0.267757  | 4.268132  |
| 80  | 6 | 0 | 3.682696  | -0.568474 | -3.326920 |
| 81  | 1 | 0 | 4.270931  | 0.302891  | -3.013103 |
| 82  | 1 | 0 | 4.260822  | -1.092592 | -4.088847 |
| 83  | 6 | 0 | 2.324853  | 0.146192  | 3.865502  |
| 84  | 1 | 0 | 1.818596  | 1.015782  | 4.294133  |
| 85  | 1 | 0 | 2.444086  | -0.591705 | 4.661098  |
| 86  | 6 | 0 | 1.515874  | 0.436765  | -2.715697 |
| 87  | 1 | 0 | 0.479650  | 0.606313  | -3.008744 |
| 88  | 1 | 0 | 1.925398  | 1.416964  | -2.447516 |
| 89  | 6 | 0 | 4.320051  | -3.494524 | -0.939109 |
| 90  | 1 | 0 | 5.267391  | -3.936348 | -0.624760 |
| 91  | 1 | 0 | 3.675076  | -4.306130 | -1.283345 |
| 92  | 6 | 0 | -3.482658 | -2.958391 | 0.832511  |
| 93  | 1 | 0 | -3.355271 | -3.579888 | -0.054536 |
| 94  | 6 | 0 | -2.327699 | -1.000605 | -3.637270 |
| 95  | 1 | 0 | -2.423434 | -1.922737 | -4.213173 |
| 96  | 1 | 0 | -1.816534 | -0.267789 | -4.268153 |
| 97  | 6 | 0 | 4.571918  | 2.494603  | 2.058636  |
| 98  | 1 | 0 | 5.507948  | 1.955010  | 1.870309  |
| 99  | 1 | 0 | 4.684567  | 3.007966  | 3.017074  |
| 100 | 6 | 0 | -4.843203 | -1.328286 | 2.035188  |
| 101 | 6 | 0 | 2.325711  | -0.145949 | -3.865339 |
| 102 | 1 | 0 | 1.820206  | -1.015776 | -4.294372 |
| 103 | 1 | 0 | 2.445019  | 0.592106  | -4.660783 |
| 104 | 1 | 0 | -5.657242 | -0.598711 | 1.986688  |
| 105 | 1 | 0 | -3.561243 | -3.620738 | 1.701162  |

**Table S13.** Optimized atomic coordinates obtained from DFT calculations of  $[3]^{2+}$

| Center Number | Atomic Number | Atomic Type | Coordinates (Angstroms) |           |          |
|---------------|---------------|-------------|-------------------------|-----------|----------|
|               |               |             | X                       | Y         | Z        |
| 1             | 7             | 0           | 1.466666                | -0.118552 | 1.589649 |
| 2             | 6             | 0           | 1.540110                | 0.865398  | 2.475045 |
| 3             | 1             | 0           | 0.651952                | 1.474978  | 2.581384 |
| 4             | 6             | 0           | 2.690407                | 1.153764  | 3.226945 |
| 5             | 1             | 0           | 2.673152                | 1.954665  | 3.953357 |
| 6             | 6             | 0           | 3.830346                | 0.433680  | 2.969909 |
| 7             | 1             | 0           | 4.760841                | 0.662597  | 3.476007 |
| 8             | 6             | 0           | 3.795035                | -0.629812 | 2.037465 |
| 9             | 6             | 0           | 2.543812                | -0.941966 | 1.418616 |
| 10            | 6             | 0           | 2.430692                | -2.129482 | 0.627305 |
| 11            | 6             | 0           | 3.608215                | -2.794567 | 0.306998 |

|    |   |   |           |           |           |
|----|---|---|-----------|-----------|-----------|
| 12 | 1 | 0 | 3.567677  | -3.658316 | -0.343180 |
| 13 | 6 | 0 | 4.864296  | -2.411350 | 0.814855  |
| 14 | 1 | 0 | 5.745656  | -2.970665 | 0.529447  |
| 15 | 6 | 0 | 4.952084  | -1.378949 | 1.713000  |
| 16 | 1 | 0 | 5.896293  | -1.120798 | 2.176622  |
| 17 | 6 | 0 | 1.136550  | -2.802201 | 0.298293  |
| 18 | 6 | 0 | 1.135565  | -4.203392 | 0.354964  |
| 19 | 1 | 0 | 2.016434  | -4.730888 | 0.686692  |
| 20 | 6 | 0 | -0.000136 | -4.908745 | 0.000282  |
| 21 | 1 | 0 | -0.000163 | -5.991508 | 0.000338  |
| 22 | 6 | 0 | -1.135796 | -4.203375 | -0.354489 |
| 23 | 1 | 0 | -2.016684 | -4.730864 | -0.686183 |
| 24 | 6 | 0 | -1.136718 | -2.802178 | -0.297972 |
| 25 | 7 | 0 | -1.466672 | -0.118591 | -1.589567 |
| 26 | 6 | 0 | -1.540006 | 0.865269  | -2.475072 |
| 27 | 1 | 0 | -0.651841 | 1.474851  | -2.581344 |
| 28 | 6 | 0 | -2.690203 | 1.153544  | -3.227159 |
| 29 | 1 | 0 | -2.672858 | 1.954371  | -3.953651 |
| 30 | 6 | 0 | -3.830168 | 0.433476  | -2.970200 |
| 31 | 1 | 0 | -4.760597 | 0.662326  | -3.476451 |
| 32 | 6 | 0 | -3.794974 | -0.629920 | -2.037641 |
| 33 | 6 | 0 | -2.543833 | -0.942000 | -1.418589 |
| 34 | 6 | 0 | -2.430807 | -2.129445 | -0.627155 |
| 35 | 6 | 0 | -3.608369 | -2.794516 | -0.306959 |
| 36 | 1 | 0 | -3.567908 | -3.658223 | 0.343280  |
| 37 | 6 | 0 | -4.864385 | -2.411355 | -0.815016 |
| 38 | 1 | 0 | -5.745776 | -2.970662 | -0.529687 |
| 39 | 6 | 0 | -4.952061 | -1.379035 | -1.713264 |
| 40 | 1 | 0 | -5.896206 | -1.120939 | -2.177047 |
| 41 | 7 | 0 | -1.466687 | 0.118695  | 1.589719  |
| 42 | 6 | 0 | -1.540127 | -0.865142 | 2.475240  |
| 43 | 1 | 0 | -0.651977 | -1.474726 | 2.581633  |
| 44 | 6 | 0 | -2.690417 | -1.153406 | 3.227191  |
| 45 | 1 | 0 | -2.673159 | -1.954213 | 3.953707  |
| 46 | 6 | 0 | -3.830350 | -0.433336 | 2.970087  |
| 47 | 1 | 0 | -4.760838 | -0.662174 | 3.476234  |
| 48 | 6 | 0 | -3.795045 | 0.630041  | 2.037511  |
| 49 | 6 | 0 | -2.543834 | 0.942088  | 1.418588  |
| 50 | 6 | 0 | -2.430704 | 2.129516  | 0.627147  |
| 51 | 6 | 0 | -3.608204 | 2.794636  | 0.306843  |
| 52 | 1 | 0 | -3.567634 | 3.658351  | -0.343382 |
| 53 | 6 | 0 | -4.864285 | 2.411498  | 0.814760  |
| 54 | 1 | 0 | -5.745636 | 2.970822  | 0.529338  |
| 55 | 6 | 0 | -4.952082 | 1.379176  | 1.712995  |
| 56 | 1 | 0 | -5.896283 | 1.121103  | 2.176677  |
| 57 | 6 | 0 | -1.136562 | 2.802194  | 0.298083  |
| 58 | 6 | 0 | -1.135578 | 4.203387  | 0.354676  |
| 59 | 1 | 0 | -2.016469 | 4.730887  | 0.686349  |
| 60 | 6 | 0 | 0.000129  | 4.908717  | -0.000031 |

|    |    |   |           |           |           |
|----|----|---|-----------|-----------|-----------|
| 61 | 1  | 0 | 0.000165  | 5.991479  | -0.000021 |
| 62 | 6  | 0 | 1.135789  | 4.203322  | -0.354751 |
| 63 | 1  | 0 | 2.016704  | 4.730781  | -0.686427 |
| 64 | 6  | 0 | 1.136695  | 2.802128  | -0.298178 |
| 65 | 7  | 0 | 1.466655  | 0.118491  | -1.589623 |
| 66 | 6  | 0 | 1.540028  | -0.865416 | -2.475073 |
| 67 | 1  | 0 | 0.651849  | -1.474969 | -2.581395 |
| 68 | 6  | 0 | 2.690279  | -1.153787 | -3.227042 |
| 69 | 1  | 0 | 2.672964  | -1.954653 | -3.953491 |
| 70 | 6  | 0 | 3.830247  | -0.433739 | -2.970036 |
| 71 | 1  | 0 | 4.760710  | -0.662651 | -3.476197 |
| 72 | 6  | 0 | 3.795013  | 0.629719  | -2.037550 |
| 73 | 6  | 0 | 2.543835  | 0.941864  | -1.418604 |
| 74 | 6  | 0 | 2.430782  | 2.129368  | -0.627263 |
| 75 | 6  | 0 | 3.608328  | 2.794464  | -0.307063 |
| 76 | 1  | 0 | 3.567825  | 3.658229  | 0.343098  |
| 77 | 6  | 0 | 4.864371  | 2.411241  | -0.815002 |
| 78 | 1  | 0 | 5.745752  | 2.970559  | -0.529664 |
| 79 | 6  | 0 | 4.952092  | 1.378838  | -1.713152 |
| 80 | 1  | 0 | 5.896262  | 1.120691  | -2.176854 |
| 81 | 28 | 0 | -0.000004 | -0.000066 | 0.000061  |
| 82 | 7  | 0 | 0.000046  | 2.118515  | -0.000047 |
| 83 | 7  | 0 | -0.000071 | -2.118546 | 0.000138  |

---

## References

1. N. G. Connelly and W. E. Geiger, *Chemical Reviews*, 1996, **96**, 877-910.
2. *APEX2 (2013); Bruker Molecular Analysis Research Tool*. Bruker AXS Inc., Madison, WI 53719-1173.
3. SAINT (2013) V8.34A; Integration Software for Single Crystal Data. Bruker AXS Inc., Madison, WI 53719-1173.
4. Sheldrick, G. M. (1996). *SADABS*, Bruker Area Detector Absorption Corrections. Bruker AXS Inc., Madison, WI 53719-1173.
5. *SHELXTL (2012) version 6.14*; Bruker Analytical X-ray Systems Inc., Madison, WI 53719-1173.
6. A. K. Pal and G. S. Hanan, *Dalton Transactions*, 2014, **43**, 11811-11814.
7. A. K. Pal, B. Laramée-Milette and G. S. Hanan, *Inorganica Chimica Acta*, 2014, **418**, 15-22.
8. C. Hamacher, N. Hurkes, A. Kaiser, A. Klein and A. Schüren, *Inorganic Chemistry*, 2009, **48**, 9947-9951.
9. C.-P. Zhang, H. Wang, A. Klein, C. Biewer, K. Stirnat, Y. Yamaguchi, L. Xu, V. Gomez-Benitez and D. A. Vicic, *Journal of the American Chemical Society*, 2013, **135**, 8141-8144.
